# Supplementary material
Source: PubMed Central journal article supplement (PMC7048169)
Supplement: NIHMS1549142-supplement-Supplemental_Material.pdf [file NIHMS1549142-supplement-Supplemental_Material.pdf]

## **SUPPLEMENTAL MATERIAL**

### **Liver Fibrosis Indices and Outcomes after Primary Intracerebral Hemorrhage**

Neal S. Parikh, MD, MS; Hooman Kamel, MD; Babak B. Navi, MD, MS; Costantino Iadecola, MD; Alexander E. Merkler, MD; Arun Jesudian, MD; Jesse Dawson, MD; Guido J. Falcone, MD, ScD, MPH; Kevin N. Sheth, MD; David J. Roh, MD; Mitchell S.V. Elkind, MD, MS; Daniel F. Hanley, MD\*; Wendy C. Ziai, MD, MPH; Santosh B. Murthy, MD, MPH

\*On behalf of the VISTA-ICH Collaborators

#### Table of Contents:

Supplemental Table I      Page 2

Supplemental Table II      Page 2

**Supplemental Table I.** Associations between Liver Fibrosis Indices and Outcomes after ICH, Stratified by Sex

| Outcome                          | APRI*            |         | FIB-4*           |         | NFS*             |         |
|----------------------------------|------------------|---------|------------------|---------|------------------|---------|
|                                  | OR (95% CI)      | p value | OR (95% CI)      | p value | OR (95% CI)      | p value |
| <b>Males</b>                     |                  |         |                  |         |                  |         |
| <b>Hematoma expansion</b>        | 1.41 (1.04-2.13) | 0.04    | 1.60 (1.02-2.79) | 0.04    | 1.19 (0.85-1.65) | 0.30    |
| <b>All-cause mortality</b>       | 1.52 (0.91-2.54) | 0.11    | 1.57 (0.77-3.19) | 0.21    | 1.00 (0.68-1.49) | 0.96    |
| <b>Death or major disability</b> | 1.14 (0.74-1.79) | 0.54    | 1.06 (0.58-1.94) | 0.83    | 0.93 (0.66-1.31) | 0.71    |
| <b>Females</b>                   |                  |         |                  |         |                  |         |
| <b>Hematoma expansion</b>        | 1.85 (0.88-3.85) | 0.09    | 2.31 (0.96-5.53) | 0.06    | 1.11 (0.76-1.62) | 0.59    |
| <b>All-cause mortality</b>       | 1.77 (0.73-4.33) | 0.21    | 2.47 (0.85-7.18) | 0.09    | 2.04 (0.86-4.81) | 0.10    |
| <b>Death or major disability</b> | 1.77 (0.83-3.80) | 0.14    | 1.92 (0.80-4.60) | 0.15    | 1.09 (0.74-1.60) | 0.66    |

Abbreviations: mRS, modified Rankin Scale; APRI, aspartate aminotransferase-platelet ratio index; FIB-4, fibrosis-4 score; NFS, Nonalcoholic Fatty Liver Disease Fibrosis score.

\* Logarithmic transformation was performed to minimize skewness.

**Supplemental Table II.** Linear Regression Analysis of the Relationship between Liver Fibrosis Indices and Admission Hematoma Volume, Stratified by Sex

|                | APRI*             |         | FIB-4*            |         | NFS*              |         |
|----------------|-------------------|---------|-------------------|---------|-------------------|---------|
|                | Beta (SE)         | p value | Beta (SE)         | p value | Beta (SE)         | p value |
| <b>Males</b>   | 0.21 (0.02-0.39)  | 0.03    | 0.23 (0.01-0.48)  | 0.045   | 0.05 (-1.94-0.10) | 0.48    |
| <b>Females</b> | 0.21 (-0.12-0.55) | 0.22    | 0.33 (-0.06-0.71) | 0.11    | 0.11 (-0.06-0.29) | 0.21    |

Abbreviations: APRI, aspartate aminotransferase-platelet ratio index; FIB-4, fibrosis-4 score; NFS, Nonalcoholic Fatty Liver Disease Fibrosis score, SE, Standard Error.

\* Logarithmic transformation was performed to minimize skewness.
